# Supplementary material for: Patient Acceptability of Home Monitoring for Neovascular Age-Related Macular Degeneration Reactivation: A Qualitative Study
Source: MDPI journal article supplement (doi:10.3390/ijerph192013714), 2022-10-21
Supplement: s1 [file s1]

**Supplementary File S7.** Common issues reported by patients during home monitoring

| <b>Reported issues</b>                                                                                                                                                                          | <b>Patient's responses to issues</b>                                                                                     | <b>Relevant constructs of technology acceptance theories</b>                                                                                                                                                   | <b>Definition of construct</b>                                                                                                                                                                                                                                                                                                                   |
|-------------------------------------------------------------------------------------------------------------------------------------------------------------------------------------------------|--------------------------------------------------------------------------------------------------------------------------|----------------------------------------------------------------------------------------------------------------------------------------------------------------------------------------------------------------|--------------------------------------------------------------------------------------------------------------------------------------------------------------------------------------------------------------------------------------------------------------------------------------------------------------------------------------------------|
| Successful methods of finding a dark space when completing the MBT inhibited actual performance of the test.                                                                                    | Test at night-time or find/create a home area with no light (e.g. under stairs, placing a blanket or material overhead). | Opportunity Costs <sup>a</sup><br>Burden <sup>a</sup><br>Effort Expectancy <sup>b</sup>                                                                                                                        | Extent to which HM causes benefits or values to be given up<br>Perceived effort required to participate in HM<br>Extent to which HM is seen as easy to do                                                                                                                                                                                        |
| The need to charge the iPod device before every occasion of testing.                                                                                                                            | Devices left on charge or paper-based<br>KeepSight journal completed before App-based tests.                             | Burden <sup>a</sup><br>Effort Expectancy <sup>b</sup><br>Output Quality <sup>c</sup><br>Perceived Effectiveness <sup>a</sup>                                                                                   | Perceived effort required to participate in HM<br>Extent to which HM is seen as easy to do<br>Extent to which HM performs its task well<br>Extent to which HM is likely to achieve its purpose                                                                                                                                                   |
| Mobile internet connection for transferring test data appeared to function inconsistently and participants were not aware or were uncertain whether or not test data was received by the study. | Home broadband connections used as an alternative where feasible.                                                        | Affective Attitude <sup>a</sup><br>Perceived Effectiveness <sup>a</sup><br>Perceived Risk <sup>b</sup><br>Output Quality <sup>c</sup>                                                                          | How individuals feel about HM<br>Extent to which HM is likely to achieve its purpose<br>Perceived negative consequences associated with HM<br>Extent to which HM performs its task well                                                                                                                                                          |
| Other technical issues e.g. Apps resting during tests, software updates, and uncertainty among participants about how to undertake tasks such as updating software.                             | Use of study helpline for support or support from family members or friends                                              | Self-efficacy <sup>a</sup><br>Effort Expectancy <sup>b</sup><br>Perceived Risk <sup>b</sup><br>Output Quality <sup>c</sup>                                                                                     | Confidence in performing HM procedures<br>Extent to which HM is seen as easy to do<br>Perceived negative consequences associated with HM<br>Extent to which HM performs its task well                                                                                                                                                            |
| Difficult to establish a testing routine due to commitments including caring roles and work responsibilities.                                                                                   | Use of reminders and prompts including diaries, self-administered phone reminders and testing at a set time/day          | Burden <sup>a</sup><br>Ethicality <sup>a</sup><br>Opportunity Costs <sup>a</sup><br>Social Influence <sup>b</sup><br>subjective norm <sup>c</sup><br>Individual Differences <sup>b</sup><br>Habit <sup>b</sup> | Perceived effort required to participate in HM<br>Extent to which HM has a good fit with the individuals' values<br>Extent to which HM causes benefits or values to be given up<br>Extent to which important others believe HM should be performed<br>Extent to which individual factors influence HM<br>Intention to HM and continued use of HM |
| Feedback from tests led to anxiety if scores declined consistently and                                                                                                                          | Consider contacting optometry/ ophthalmology services.                                                                   | Self-efficacy <sup>a</sup><br>Intervention Coherence <sup>a</sup>                                                                                                                                              | Confidence in performing HM procedures<br>Extent to which HM purpose and how it works is understood                                                                                                                                                                                                                                              |

|                                                                                                                                                   |                                                                                               |                                                                                                                                                                                                                                                                                                                        |
|---------------------------------------------------------------------------------------------------------------------------------------------------|-----------------------------------------------------------------------------------------------|------------------------------------------------------------------------------------------------------------------------------------------------------------------------------------------------------------------------------------------------------------------------------------------------------------------------|
| <p>were attributed to deterioration in vision.</p>                                                                                                |                                                                                               | <p>Perceived Effectiveness<sup>a</sup> Extent to which HM is likely to achieve its purpose</p> <p>Performance Expectancy<sup>b</sup> Extent to which HM will help with eye care</p> <p>Job Relevance<sup>c</sup> Extent to which result are observable and</p> <p>Results Demonstrability<sup>c</sup> communicable</p> |
| <p>Problems or issues with testing - if they were not easy to overcome without support, could lead to testing becoming irregular or stopping.</p> | <p>Use of 'problem solving' and support from study helpline or family members or friends.</p> | <p>Self-efficacy<sup>a</sup> Confidence in performing HM procedures</p> <p>Affective Attitude<sup>a</sup> How individuals feel about HM</p> <p>Burden<sup>a</sup> Effort required to participate in HM</p> <p>Facilitating conditions<sup>b</sup> Extent to which infrastructure exists to support HM</p>              |
| <p>Eye patches that were used when undertaking testing caused discomfort and were a distraction, thereby affecting test performance.</p>          | <p>Modifications made to the eye patch.</p>                                                   | <p>Burden<sup>a</sup> Perceived effort required to participate in HM</p> <p>Perceived Effectiveness<sup>a</sup> Extent to which HM is likely to achieve its purpose</p>                                                                                                                                                |

a Theoretical Framework of Acceptability; b Unified Theory of Acceptance and Use of Technology; c Technology Acceptance Model; HM: Home Monitoring.
