# Supplementary material for: Patient Acceptability of Home Monitoring for Neovascular Age-Related Macular Degeneration Reactivation: A Qualitative Study
Source: MDPI journal article supplement (doi:10.3390/ijerph192013714), 2022-10-21
Supplement: s1 [file s1]

## Supplementary File S2. Framework for coding of interview transcripts

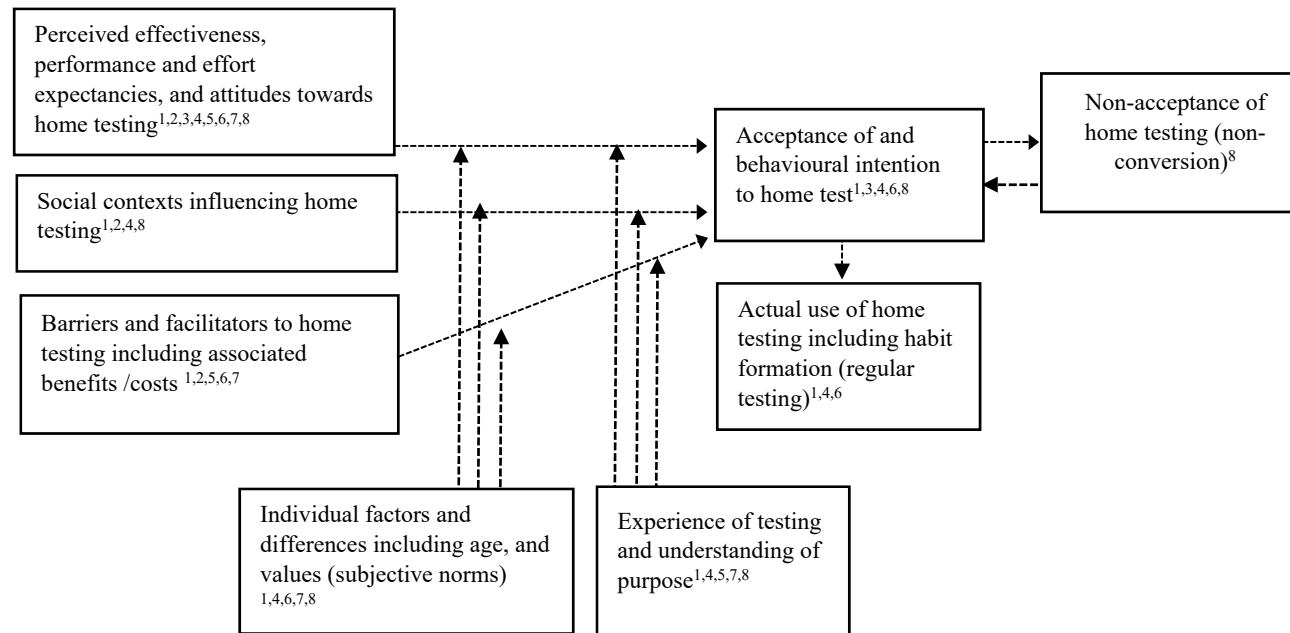

<sup>1</sup>Unified Theory of Acceptance and Use of Technology; <sup>2</sup>Extended Unified Theory of Acceptance and Use of Technology; <sup>3</sup>Technology Acceptance Model;

<sup>4</sup>Technology Acceptance Model (TAM2); <sup>5</sup>Extended Technology Acceptance Model; <sup>6</sup>Extended Technology Acceptance Model for elderly people; <sup>7</sup>Theoretical Framework of Acceptability (v2) <sup>8</sup>Senior Technology Acceptance and Adoption model (STAM)
