# Supplementary material for: Patient Acceptability of Home Monitoring for Neovascular Age-Related Macular Degeneration Reactivation: A Qualitative Study
Source: MDPI journal article supplement (doi:10.3390/ijerph192013714), 2022-10-21
Supplement: s1 [file s1]

# Supplementary File S4. Relationship between themes and coding of interview data

| Themes     | The role of home monitoring       |                                     | Suitability of procedures and instruments    | Experience of procedures            |                                 |                                          | Feasibility of regular home monitoring in usual service delivery |                                         | Impediments to home monitoring |                                           |
|------------|-----------------------------------|-------------------------------------|----------------------------------------------|-------------------------------------|---------------------------------|------------------------------------------|------------------------------------------------------------------|-----------------------------------------|--------------------------------|-------------------------------------------|
| Sub-themes | <i>Understanding purpose</i>      | <i>Perceived impact on eye care</i> |                                              | <i>Training for home monitoring</i> | <i>Test preferences</i>         | <i>Use of MBT test feedback and data</i> | <i>Frequency of home monitoring and habit formation</i>          | <i>Use of ongoing support</i>           | <i>Practical issues</i>        | <i>Personal health and social factors</i> |
| Codes      | Relevance to eye care             | Perceived usefulness                | Individual preferences and use of technology | Technology apprehension             | Perceived ease of use           | Perceived threat of deterioration        | Burden/perceived effort                                          | Check-in calls for non-testers          | Technology reliability[3]      | Health status[2]                          |
|            | Threat of deterioration in vision | Job relevance                       | Technology apprehension                      | Information quality                 | Burden/perceived effort         | Results demonstrability                  | Technology persistence                                           | Family support (not subjective norm)[2] | Burden/perceived effort        | Social context[2]                         |
|            | Perceived usefulness              | Waiting time a concern              | Individual differences - Age [1]             | Views on training                   | Actual behaviour/acceptance     | Job relevance                            | Habit                                                            |                                         | Output quality                 | Individual differences - Age [2]          |
|            | Intervention coherence            | Comfort with services               | Attitude                                     |                                     | Self-efficacy                   | Reported performance                     | Self-efficacy                                                    |                                         |                                |                                           |
|            |                                   | Professionalism of healthcare staff | Behavioural intention to HM                  |                                     | System characteristics          | Self-efficacy                            | Actual behaviour/Acceptance                                      |                                         |                                |                                           |
|            |                                   | Reduced travel                      | Information quality                          |                                     | Reported experience             |                                          | Family support (not subjective norm)[1]                          |                                         |                                |                                           |
|            |                                   |                                     | Health status[1]                             |                                     | Technology reliability[1]       |                                          |                                                                  |                                         |                                |                                           |
|            |                                   |                                     | Image                                        |                                     | Perceived enjoyment             |                                          | Technology reliability [2]                                       |                                         |                                |                                           |
|            |                                   |                                     |                                              |                                     | Technology playfulness/ Comfort |                                          | Health professional opinion (similar to subjective norm)         |                                         |                                |                                           |

Numbers in brackets represent codes which were evident across different themes, and highlight the number of times the code emerged.
