# Supplementary material for: Patient Acceptability of Home Monitoring for Neovascular Age-Related Macular Degeneration Reactivation: A Qualitative Study
Source: MDPI journal article supplement (doi:10.3390/ijerph192013714), 2022-10-21
Supplement: s1 [file s1]

**Supplementary File S3. Final scheme for coding of interview data**

| <b>Code</b> | <b>Definition</b>                            |
|-------------|----------------------------------------------|
| 1           | Burden/Perceived amount of effort            |
| 2           | Ethicality                                   |
| 3           | Intervention coherence                       |
| 4           | Opportunity costs                            |
| 5           | Perceived effectiveness/perceived usefulness |
| 6           | Self-efficacy                                |
| 7           | Perceived ease of use                        |
| 8           | Attitude                                     |
| 9           | Behavioural intention                        |
| 10          | Actual behaviour/acceptance                  |
| 11          | Subjective norm                              |
| 12          | Facilitating or inhibiting conditions        |
| 13          | Image                                        |
| 14          | Job relevance                                |
| 15          | Output quality                               |
| 16          | Results demonstrability                      |
| 17          | Individual differences                       |

|    |                                                    |                                                                                                                                                                                                                      |
|----|----------------------------------------------------|----------------------------------------------------------------------------------------------------------------------------------------------------------------------------------------------------------------------|
| 18 | System characteristics                             | System characteristics are those salient features of iPod home monitoring (a system) that can help individuals develop favourable (or unfavourable) perceptions regarding the usefulness or ease of use of a system. |
| 19 | Technology apprehension                            | The degree to which an individual experiences apprehension, or fear, when she/he is faced with the possibility of using technology (computers)                                                                       |
| 20 | Technology playfulness/comfortable with technology | The opposite of technology apprehension. The degree to which an individual is open to experiment, spontaneous interact or 'give technology a go' and comfort with technology                                         |
| 21 | Technology persistence                             | Not at the same level as technology playfulness but participant appears willing to try to troubleshoot or rectify problems that may arise when using the iPod                                                        |
| 22 | Perceived enjoyment                                | The extent to which an individual perceives home monitoring to be enjoyable in its own right                                                                                                                         |
| 23 | Reported experience                                | Participant actual experience of rather than perception of effort required to test when using the iPod                                                                                                               |
| 24 | Voluntariness                                      | A choice rather than enforcement of iPod home monitoring                                                                                                                                                             |
| 25 | Technology reliability                             | Output quality in terms of data transfer and equipment reliability                                                                                                                                                   |
| 26 | General health status                              | Participant's perception of their general health status                                                                                                                                                              |
| 27 | Perceived threat                                   | An individual's perception of severity and susceptibility that eye health may deteriorate e.g. AMD no longer treatable, will lose sight or progression of AMD to other eye                                           |
| 28 | Health beliefs and concerns about eye health       | An individual's beliefs and concerns around AMD                                                                                                                                                                      |
| 29 | Habit                                              | The reported experience and perception that home monitoring has/has not become habitual                                                                                                                              |
| 30 | Aging                                              | Functional, health, sensory, cognitive and mobility changes associated with increasing age influencing home monitoring                                                                                               |
| 31 | Medical Services satisfaction                      | The extent to which participants are satisfied with current health care services for AMD                                                                                                                             |
| 32 | Affordability of health services                   | Refers to the affordability of health services e.g. private health care within NHS context                                                                                                                           |
| 33 | Comfort with health services                       | Refers to the psychological feelings of patients towards health services and hospital environment e.g. cleanliness of hospital                                                                                       |
| 34 | Professionalism of healthcare staff                | Refers to knowledge, skills and interpersonal skills of healthcare staff                                                                                                                                             |
| 35 | Safety of healthcare                               | Participant's perception of healthcare safety e.g. experienced medical teams, complete medical facilities, hospital security measures                                                                                |
| 36 | Waiting time                                       | Patient's perception of waiting time for appointments, treatment etc.                                                                                                                                                |
| 37 | Information quality                                | Home monitoring can provide useful information                                                                                                                                                                       |

|    |                                                                           |                                                                                                                                                                                                                           |
|----|---------------------------------------------------------------------------|---------------------------------------------------------------------------------------------------------------------------------------------------------------------------------------------------------------------------|
| 38 | Usual care versus home monitoring                                         | The perception of an individual to choose the physical hospital environment over the 'virtual'/home monitoring hospital environment includes: recommending current hospital to others and continuing to use this hospital |
| 39 | Perceived security                                                        | Perceived risk or protection from the transfer, management and analysis of personal health information                                                                                                                    |
| 40 | Healthcare professional's (Doctor's) opinion (similar to Subjective norm) | Influence of healthcare professionals as they are perceived to be a point of expert authority                                                                                                                             |
| 41 | Motivational intention to participate in, or seek out latest research     | Participant expresses an intention or gets involved in research                                                                                                                                                           |
| 42 | Views about training/preparation                                          | Participant describes their experience and perception of the training session or preparing themselves for home monitoring                                                                                                 |
| 43 | Other influencing factors                                                 | Participant makes references to factors not otherwise covered by codes within this framework                                                                                                                              |
| 44 | Family support (not Subjective norms)                                     | Participant makes reference to the presence of family or a significant other                                                                                                                                              |
| 45 | Emotion                                                                   | Participant describes stress, anxiety or experience of trauma                                                                                                                                                             |
| 46 | Major life event                                                          | Participant refers to major life event                                                                                                                                                                                    |
| 47 | Social context                                                            | Participant describes their living space, residential area, whether or not they live with others.                                                                                                                         |
| 48 | Reported performance                                                      | Participant describes their performance on one or more tests                                                                                                                                                              |
| 49 | Keep Sight Journal                                                        | Participant describes features and perception of the paper-based KSJ                                                                                                                                                      |
| 50 | Multibit                                                                  | Participant describes features and perception of the electronic 'numbers' Multibit test                                                                                                                                   |
| 51 | My Vision Track                                                           | Participant describes features and perception of the electronic 'bumpy circles/odd one out' My Vision Track test                                                                                                          |
| 52 | Check-in calls for non-testers                                            | Participant describes having been contacted by CTEU due to non-regular testing                                                                                                                                            |
| 53 | Experience with eye care                                                  | Participant describes what happens or what has happened when they have been in contact with their local Macular, optometry or ophthalmologist service                                                                     |
| 54 | Order of test                                                             | Preferential or chronological order of tests                                                                                                                                                                              |
| 55 | Travel                                                                    | Participant describes how they get to their usual appointments, includes incurred expenses or parking difficulties                                                                                                        |
