# Supplementary material for: Patient Acceptability of Home Monitoring for Neovascular Age-Related Macular Degeneration Reactivation: A Qualitative Study
Source: Int J Environ Res Public Health. 2022 Oct 21;19(20):13714. doi: 10.3390/ijerph192013714 (PMC9603709; doi:10.3390/ijerph192013714)
Supplement: Supplementary file 1 [file ijerph-19-13714-s001.zip]

Archive with 7 entries (7 files):
- ijerph-1916263-supplementary file S1.pdf
- ijerph-1916263-supplementary file S2.pdf
- ijerph-1916263-supplementary file S3.pdf
- ijerph-1916263-supplementary file S4.pdf
- ijerph-1916263-supplementary file S5.pdf
- ijerph-1916263-supplementary file S6.pdf
- ijerph-1916263-supplementary file S7.pdf
